# Supplementary material
Source: publisher site journal article supplement (https://www.dovepress.com/article/425454)
Supplement: Supplementary file 1 [file get_supplementary_file.php]

# Supplementary appendix

**Supplementary Table 1** ANOVA/ANCOVA analysis for variables among the preperimetric PA, perimetric PA and control groups

|  | Preperimetric  PA | Perimetric  PA | Controls | ANOVA/ANCOVA  PValue | Pairwise comparisons  P1 Value P2 Value P3 Value | | | |
| --- | --- | --- | --- | --- | --- | --- | --- | --- |
| Age, years | 48.4±6.7 | 44.5±11.6 | 50.3±12.8 | 0.181a | 0.656b | 0.070b | | 0.359b |
| Average RNFL thickness, μm | 103.2±10.5 | 98.9±10.7 | 105.1±5.0 | **0.044**a | 0.523b | **0.015**b | | 0.141b |
| Nasal RNFL thickness, μm | 76.9±10.0 | 70.2±12.4 | 76.9±6.2 | **0.031**a | 0.997b | 0.020b | | **0.040**b |
| Average optic disc vessel density, % | 65.9±4.8 | 59.2±6.6 | 62.9±4.3 | **0.003**c | 0.164d | **0.019**d | | **0.002**d |
| Nasal optic disc vessel density, %  Temporal optic disc vessel density, % | 63.0±5.2  61.7±4.4 | 56.8±7.7  55.7±6.6 | 63.0±4.4  62.8±4.0 | **0.003**c  **<0.001**c | 0.998d  0.657d | **0.001**d  **<0.001**d | | **0.034**d  **0.022**d |
| Average parafoveal SCP vessel density, % | 51.0±3.9 | 49.6±2.3 | 48.3±2.4 | **0.039**c | **0.015**d | | 0.085d | 0.195d |
| Average parafoveal DCP vessel density, % | 53.4±1.9 | 52.0±3.4 | 52.8±3.7 | 0.512c | 0.686d | 0.400d | | 0.314d |

**Notes:**

Bold face indicates statistically significant p value.

a one-way analysis of variance (ANOVA)

b post hoc test followed by ANOVA

c analysis of covariance (ANCOVA) with gender as covariate

d post hoc test followed by ANCOVA

P1 Value = P value of preperimetric PA subgroup versus controls

P2 Value = P value of perimetric PA subgroup versus controls

P3 Value = P value of preperimetric PA subgroup versus perimetric PA subgroup

**Abbreviations:** PA, pituitary adenoma; RNFL, retinal nerve fiber layer; SCP, superficial capillary plexus; DCP, deep capillary plexus.
